# Supplementary material for: Delayed triggering of oestrogen induced apoptosis that contrasts with rapid paclitaxel-induced breast cancer cell death
Source: PubMed Central journal article supplement — Br J Cancer. 2014 Feb 18;110(6):1488–96. doi: 10.1038/bjc.2014.50 (PMC3960622; doi:10.1038/bjc.2014.50), 2014-02-18
Supplement: bjc201450x1.pdf [file bjc201450x1.pdf]

# **Delayed triggering of estrogen induced apoptosis that contrasts with paclitaxel induced breast cancer cell death.**

Ifeyinwa Obiorah<sup>1</sup> , Surojeet Sengupta<sup>1</sup> , Ping Fan<sup>1</sup> and V. Craig Jordan<sup>1</sup>

<sup>1</sup>Department of Oncology, Lombardi Comprehensive Cancer Center, Georgetown University Medical Center, Washington, DC 20057

**A**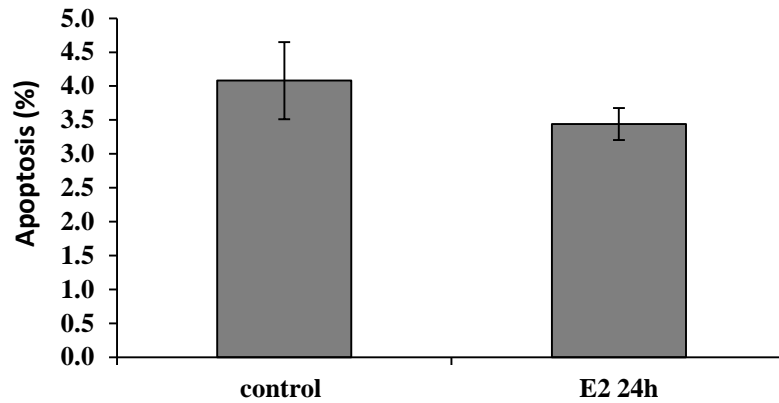**B**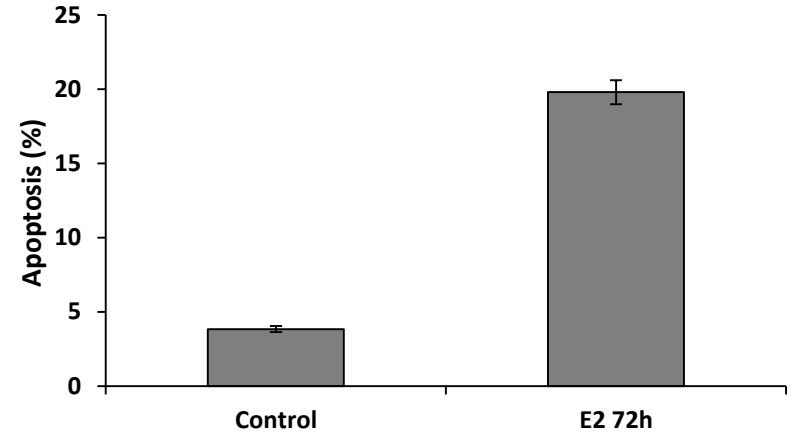**C**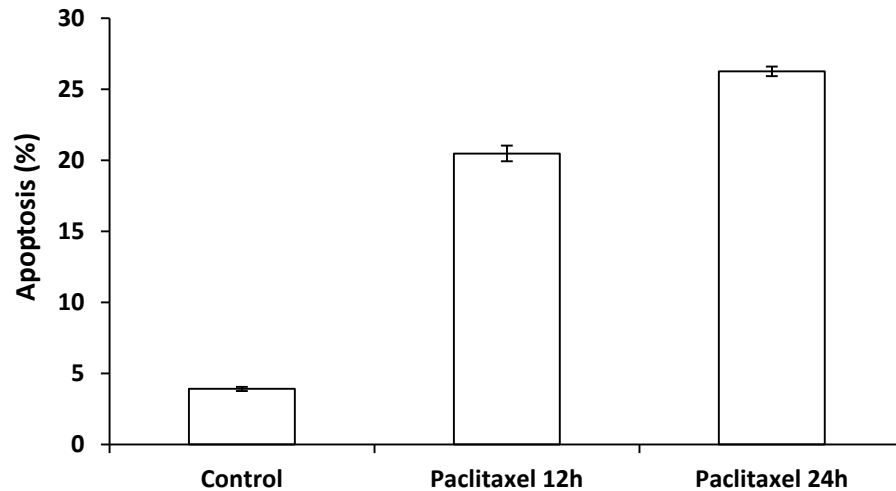**Figure S1. Annexin v analysis of apoptotic effects of E<sub>2</sub> and paclitaxel**

MCF7:5C cells were treated with control or E<sub>2</sub>(1nM) for (A) 24h and (B) 72h or (C) paclitaxel (1μM) for 12h and 24h and then stained with annexin v-FITC and propidium iodide and analysed by flow cytometry. All the data shown were representative of at least three separate experiments with similar results.

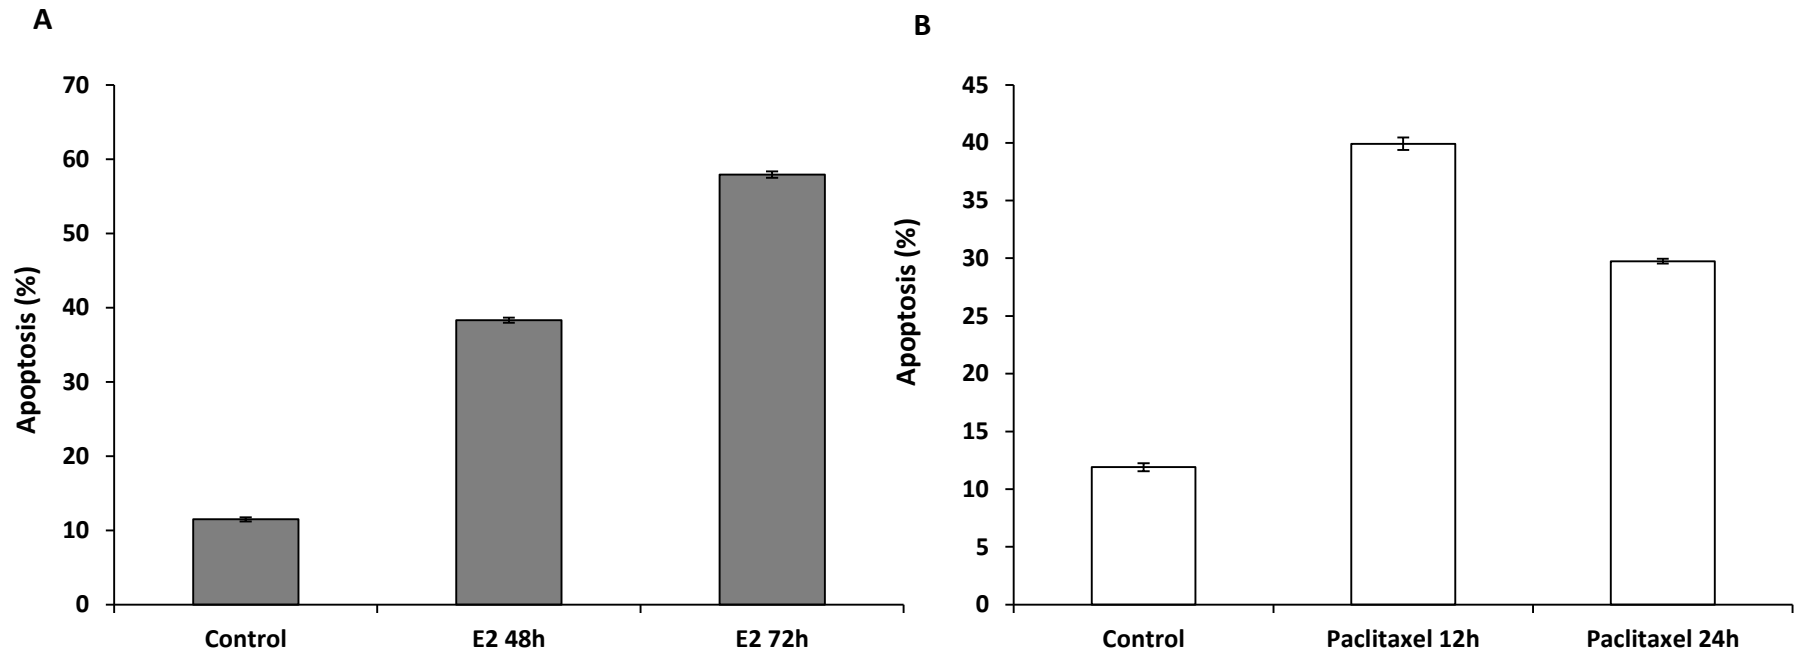

**Figure S2. Analysis of apoptotic effects of E<sub>2</sub> and paclitaxel**

MCF7:5C cells were treated with control or (A) E<sub>2</sub>(1nM) for 48h and 72h or (B) paclitaxel (1μM) for 12h and 24h and then stained with nucleic acid dye YO-PRO-1 and propidium iodide and analysed by flow cytometry. All the data shown were representative of at least three separate experiments with similar results.

## Supplementary tables

| E2 24h        |                   |             |                     | 4OHT 24h    |                   |             |                     | E2 + 4OHT 24h |                   |             |                     |
|---------------|-------------------|-------------|---------------------|-------------|-------------------|-------------|---------------------|---------------|-------------------|-------------|---------------------|
| Gene Symbol   | Fold Upregulation | Gene Symbol | Fold Downregulation | Gene Symbol | Fold Upregulation | Gene Symbol | Fold Downregulation | Gene Symbol   | Fold Upregulation | Gene Symbol | Fold Downregulation |
| ANXA1         | 2.6642            | AZU1        | -2.8281             | BTK         | 4.5831            | FAIM2       | -5.3749             | BTK           | 4.2488            | FAIM2       | -3.8558             |
| BTK           | 4.254             | BAD         | -3.0409             | CD2         | 15.8532           | PIK3R2      | -2.9528             | CD2           | 5.2187            | LCK         | -2.912              |
| CCL2          | 2.9912            | BAG1        | -3.1635             | SPN         | 17.1101           |             |                     | SPN           | 22.3084           | MKL1        | -2.661              |
| CD2           | 4.8261            | BBC3        | -2.6119             | TNFRSF8     | 84.6702           |             |                     | TLR2          | 2.7401            | PCBP4       | -2.8633             |
| IGF1R         | 2.9459            | BCL2L10     | -2.5516             | TNFSF14     | 47.0314           |             |                     | TNFRSF8       | 85.0313           | PIK3R2      | -2.9231             |
| NME5          | 4.8002            | BCL3        | -3.6406             |             |                   |             |                     | TNFSF14       | 45.1955           |             |                     |
| <b>PMAIP1</b> | 3.135             | BIK         | -11.5845            |             |                   |             |                     |               |                   |             |                     |
| SPN           | 12.0116           | CARD14      | -2.7052             |             |                   |             |                     |               |                   |             |                     |
| TLR2          | 3.2626            | CASP1       | -2.5243             |             |                   |             |                     |               |                   |             |                     |
| TNFRSF8       | 62.9856           | CASP10      | -4.2551             |             |                   |             |                     |               |                   |             |                     |
| TNFSF14       | 33.4653           | CASP9       | -3.9836             |             |                   |             |                     |               |                   |             |                     |
| TPD52L1       | 2.845             | CD5         | -10.9716            |             |                   |             |                     |               |                   |             |                     |
|               |                   | CDKN1A      | -2.7118             |             |                   |             |                     |               |                   |             |                     |
|               |                   | DDAH2       | -2.6247             |             |                   |             |                     |               |                   |             |                     |
|               |                   | FAIM2       | -30.8131            |             |                   |             |                     |               |                   |             |                     |
|               |                   | GRM4        | -2.8359             |             |                   |             |                     |               |                   |             |                     |
|               |                   | IER3        | -3.2835             |             |                   |             |                     |               |                   |             |                     |
|               |                   | IFI6        | -2.7991             |             |                   |             |                     |               |                   |             |                     |
|               |                   | INHHA       | -3.0531             |             |                   |             |                     |               |                   |             |                     |
|               |                   | LCK         | -5.0081             |             |                   |             |                     |               |                   |             |                     |
|               |                   | MOAP1       | -3.1249             |             |                   |             |                     |               |                   |             |                     |
|               |                   | MX1         | -2.9387             |             |                   |             |                     |               |                   |             |                     |
|               |                   | NOX5        | -3.2371             |             |                   |             |                     |               |                   |             |                     |
|               |                   | NUPR1       | -2.8728             |             |                   |             |                     |               |                   |             |                     |
|               |                   | PAX7        | -58.5159            |             |                   |             |                     |               |                   |             |                     |
|               |                   | PCBP4       | -3.1573             |             |                   |             |                     |               |                   |             |                     |
|               |                   | PIK3R2      | -4.2368             |             |                   |             |                     |               |                   |             |                     |
|               |                   | PRODH       | -3.6534             |             |                   |             |                     |               |                   |             |                     |
|               |                   | PROP1       | -3.1935             |             |                   |             |                     |               |                   |             |                     |
|               |                   | RARG        | -2.6272             |             |                   |             |                     |               |                   |             |                     |
|               |                   | SOCS3       | -5.2735             |             |                   |             |                     |               |                   |             |                     |
|               |                   | STAT1       | -2.5034             |             |                   |             |                     |               |                   |             |                     |
|               |                   | STAT5A      | -2.887              |             |                   |             |                     |               |                   |             |                     |
|               |                   | TIMP3       | -7.8453             |             |                   |             |                     |               |                   |             |                     |
|               |                   | TNFSF10     | -3.8052             |             |                   |             |                     |               |                   |             |                     |
|               |                   | TP73        | -2.7885             |             |                   |             |                     |               |                   |             |                     |
|               |                   | TSC22D3     | -3.2667             |             |                   |             |                     |               |                   |             |                     |

**Table S1. Gene list of E2 (1nM) regulated apoptotic genes in MCF7:5C cells at 24h of treatment versus vehicle treatment in comparison to 4OHT.** Apoptotic genes regulated by E2 and 4OHT after 24 h treatment were determined using RT-profiler assay kits for apoptosis. Data values include the genes which were at least 2.5 fold up-regulated or down-regulated relative to the vehicle treatment. The genes which achieve the statistical significance of p value of 0.05 were selected for creating this gene list.

| E2 36h      |                   |             |                     | 4OHT 36h    |                   |             |                     | E2 + 4OHT 36h |                   |             |                     |
|-------------|-------------------|-------------|---------------------|-------------|-------------------|-------------|---------------------|---------------|-------------------|-------------|---------------------|
| Gene Symbol | Fold Upregulation | Gene Symbol | Fold Downregulation | Gene Symbol | Fold Upregulation | Gene Symbol | Fold Downregulation | Gene Symbol   | Fold Upregulation | Gene Symbol | Fold Downregulation |
| ANXA1       | 13.087            | AIFM2       | -3.2919             | ANXA1       | 2.5671            | FAIM2       | -4.7651             | ANXA1         | 3.1103            | PAX7        | -3.215              |
| BCL2L11     | 2.5359            | AKT1        | -2.5341             | SOCS2       | 8.5236            | PRODH       | -2.5397             | SOCS2         | 7.4229            |             |                     |
| CEBPB       | 3.8483            | ALOX15B     | -3.3452             |             |                   | TIMP3       | -4.8255             |               |                   |             |                     |
| CEBPG       | 3.5422            | ATF5        | -2.6333             |             |                   | TP73        | -6.1608             |               |                   |             |                     |
| DAPK1       | 2.9495            | BAD         | -2.9942             |             |                   |             |                     |               |                   |             |                     |
| DDIT3       | 4.674             | BAG1        | -4.0335             |             |                   |             |                     |               |                   |             |                     |
| ERN1        | 3.6467            | BAG3        | -2.9004             |             |                   |             |                     |               |                   |             |                     |
| LGALS1      | 3.8284            | NKX3-2      | -3.3439             |             |                   |             |                     |               |                   |             |                     |
| NGFR        | 3.8614            | BIK         | -4.4621             |             |                   |             |                     |               |                   |             |                     |
| NRG2        | 3.703             | BIRC8       | -4.7179             |             |                   |             |                     |               |                   |             |                     |
| PMAIP1      | 4.0604            | CD2         | -4.2265             |             |                   |             |                     |               |                   |             |                     |
| SOCS2       | 13.2718           | CD5         | -3.5601             |             |                   |             |                     |               |                   |             |                     |
| TP63        | 20.7639           | CDKN1A      | -2.895              |             |                   |             |                     |               |                   |             |                     |
|             |                   | CRYAB       | -5.5114             |             |                   |             |                     |               |                   |             |                     |
|             |                   | DHCR24      | -3.0666             |             |                   |             |                     |               |                   |             |                     |
|             |                   | EDAR        | -3.3839             |             |                   |             |                     |               |                   |             |                     |
|             |                   | FAIM2       | -17.3873            |             |                   |             |                     |               |                   |             |                     |
|             |                   | HSPA1B      | -4.0028             |             |                   |             |                     |               |                   |             |                     |
|             |                   | IER3        | -3.0545             |             |                   |             |                     |               |                   |             |                     |
|             |                   | IFI6        | -3.1681             |             |                   |             |                     |               |                   |             |                     |
|             |                   | NOX5        | -3.4359             |             |                   |             |                     |               |                   |             |                     |
|             |                   | PAX7        | -98.7112            |             |                   |             |                     |               |                   |             |                     |
|             |                   | PCBP4       | -2.7309             |             |                   |             |                     |               |                   |             |                     |
|             |                   | PLEKHF1     | -3.261              |             |                   |             |                     |               |                   |             |                     |
|             |                   | PRODH       | -4.1825             |             |                   |             |                     |               |                   |             |                     |
|             |                   | PROP1       | -3.5416             |             |                   |             |                     |               |                   |             |                     |
|             |                   | S100B       | -3.2727             |             |                   |             |                     |               |                   |             |                     |
|             |                   | SIPA1       | -5.8335             |             |                   |             |                     |               |                   |             |                     |
|             |                   | SOCS3       | -8.0719             |             |                   |             |                     |               |                   |             |                     |
|             |                   | SPN         | -2.7479             |             |                   |             |                     |               |                   |             |                     |
|             |                   | STAT1       | -2.5343             |             |                   |             |                     |               |                   |             |                     |
|             |                   | TIMP3       | -14.3925            |             |                   |             |                     |               |                   |             |                     |
|             |                   | TNFRSF10D   | -3.0312             |             |                   |             |                     |               |                   |             |                     |
|             |                   | TNFRSF9     | -2.526              |             |                   |             |                     |               |                   |             |                     |
|             |                   | TNFSF10     | -7.3991             |             |                   |             |                     |               |                   |             |                     |
|             |                   | TNFSF14     | -5.6928             |             |                   |             |                     |               |                   |             |                     |
|             |                   | TNFSF18     | -3.5206             |             |                   |             |                     |               |                   |             |                     |
|             |                   | TP73        | -4.195              |             |                   |             |                     |               |                   |             |                     |

**Table S2. Gene list of E2 (1nM) regulated apoptotic genes in MCF7:5C cells at 36h of treatment versus vehicle treatment in comparison to 4OHT.** Apoptotic genes regulated by E2 and 4OHT after 36 h treatment were determined using RT-profiler assay kits for apoptosis. Data values include the genes which were at least 2.5 fold up-regulated or down-regulated relative to the vehicle treatment. The genes which achieve the statistical significance of p value of 0.05 were selected for creating this gene list.

| E2 48h      |                 |             |                      | 4OHT 48h    |                   |             |                     | E2 + 4OHT 48h |                   |             |                     |
|-------------|-----------------|-------------|----------------------|-------------|-------------------|-------------|---------------------|---------------|-------------------|-------------|---------------------|
| Gene Symbol | Fold Regulation | Gene Symbol | Fold Down regulation | Gene Symbol | Fold Upregulation | Gene Symbol | Fold Downregulation | Gene Symbol   | Fold Upregulation | Gene Symbol | Fold Downregulation |
| ANXA1       | 57.3851         | BAD         | -2.5023              | LTA         | 2.6067            | CASP1       | -3.956              | DDIT3         | 3.8055            | CASP1       | -3.8153             |
| BCL2L10     | 11.1112         | BAG1        | -2.7721              | SFN         | 15.8793           | FAIM2       | -3.2491             | SFN           | 9.1735            | FAIM2       | -4.6224             |
| BCL2L11     | 6.1039          | BAG3        | -2.6497              | SOCS2       | 6.057             | PAK7        | -2.5648             | SOCS2         | 6.901             | PAK7        | -3.2137             |
| BCL6        | 3.0659          | BIK         | -4.2268              | SPP1        | 3.6436            | PAX7        | -4.2314             |               |                   | PAX7        | -4.9887             |
| CARD6       | 5.1788          | CASP1       | -8.1698              | TPD52L1     | 3.0662            | TIMP3       | -7.6083             |               |                   | SOCS3       | -2.682              |
| CASP14      | 4.1381          | DHCR24      | -4.8597              |             |                   |             |                     |               |                   | TIMP3       | -4.8827             |
| CEBPB       | 5.3823          | FAIM2       | -9.287               |             |                   |             |                     |               |                   |             |                     |
| CEBPG       | 4.403           | IER3        | -3.2977              |             |                   |             |                     |               |                   |             |                     |
| DAPK1       | 10.1625         | IFI16       | -2.8643              |             |                   |             |                     |               |                   |             |                     |
| DAPK2       | 3.3865          | IFI6        | -3.108               |             |                   |             |                     |               |                   |             |                     |
| DBP         | 3.2951          | NOL3        | -3.4184              |             |                   |             |                     |               |                   |             |                     |
| DDIT3       | 8.5521          | PAK7        | -3.222               |             |                   |             |                     |               |                   |             |                     |
| ERN1        | 6.268           | PAX7        | -32.2886             |             |                   |             |                     |               |                   |             |                     |
| LTA         | 8.9147          | PDCD6       | -2.8903              |             |                   |             |                     |               |                   |             |                     |
| LTB         | 2.8441          | PLEKHF1     | -3.4435              |             |                   |             |                     |               |                   |             |                     |
| FAS         | 3.1267          | SOCS3       | -4.8034              |             |                   |             |                     |               |                   |             |                     |
| HRK         | 3.3396          | TIMP3       | -35.754              |             |                   |             |                     |               |                   |             |                     |
| IGF1R       | 5.1589          | TNFSF10     | -3.1145              |             |                   |             |                     |               |                   |             |                     |
| IL18        | 2.7084          |             |                      |             |                   |             |                     |               |                   |             |                     |
| JMY         | 7.5993          |             |                      |             |                   |             |                     |               |                   |             |                     |
| LGALS1      | 18.2555         |             |                      |             |                   |             |                     |               |                   |             |                     |
| MYC         | 2.8013          |             |                      |             |                   |             |                     |               |                   |             |                     |
| NDUFA13     | 7.2126          |             |                      |             |                   |             |                     |               |                   |             |                     |
| NGFR        | 6.8376          |             |                      |             |                   |             |                     |               |                   |             |                     |
| PMAIP1      | 7.6316          |             |                      |             |                   |             |                     |               |                   |             |                     |
| PRKCE       | 3.0529          |             |                      |             |                   |             |                     |               |                   |             |                     |
| SFN         | 9.2554          |             |                      |             |                   |             |                     |               |                   |             |                     |
| SOCS2       | 9.5122          |             |                      |             |                   |             |                     |               |                   |             |                     |
| SPP1        | 5.5017          |             |                      |             |                   |             |                     |               |                   |             |                     |
| TLR2        | 4.2949          |             |                      |             |                   |             |                     |               |                   |             |                     |
| TNF         | 4.228           |             |                      |             |                   |             |                     |               |                   |             |                     |
| TNFAIP3     | 3.0417          |             |                      |             |                   |             |                     |               |                   |             |                     |
| TNFRSF21    | 2.5535          |             |                      |             |                   |             |                     |               |                   |             |                     |
| TP53        | 2.612           |             |                      |             |                   |             |                     |               |                   |             |                     |
| TP63        | 90.3002         |             |                      |             |                   |             |                     |               |                   |             |                     |
| TPD52L1     | 4.1153          |             |                      |             |                   |             |                     |               |                   |             |                     |
| ZAK         | 3.3906          |             |                      |             |                   |             |                     |               |                   |             |                     |

**Table S3. Gene list of E2 (1nM) regulated apoptotic genes in MCF7:5C cells at 48h of treatment versus vehicle treatment in comparison to 4OHT.** Apoptotic genes regulated by E2 and 4OHT after 48 h treatment were determined using RT-profiler assay kits for apoptosis. Data values include the genes which were at least 2.5 fold up-regulated or down-regulated relative to the vehicle treatment. The genes which achieve the statistical significance of p value of 0.05 were selected for creating this gene list.
